# Supplementary material for: A Data-Driven Approach to Defining Risk-Adjusted Coding Specificity Metrics for a Large U.S. Dementia Patient Cohort
Source: MDPI journal article supplement (doi:10.3390/healthcare12100983), 2024-05-10
Supplement: s1 [file s1]

Supplementary Table S1: List of specified dementia ICD-10 codes and corresponding descriptions

| Specified ICD-10 Code | Description                                                                                                                                                 |
|-----------------------|-------------------------------------------------------------------------------------------------------------------------------------------------------------|
| F0150                 | Vascular dementia, unspecified severity, without behavioral disturbance, psychotic disturbance, mood disturbance, and anxiety                               |
| F0151                 | Vascular dementia with behavioral disturbance                                                                                                               |
| F01511                | Vascular dementia, unspecified severity, with agitation                                                                                                     |
| F01518                | Vascular dementia, unspecified severity, with other behavioral disturbance                                                                                  |
| F0152                 | Vascular dementia, unspecified severity, with psychotic disturbance                                                                                         |
| F0153                 | Vascular dementia, unspecified severity, with mood disturbance                                                                                              |
| F0154                 | Vascular dementia, unspecified severity, with anxiety                                                                                                       |
| F01A0                 | Vascular dementia, mild, without behavioral disturbance, psychotic disturbance, mood disturbance, and anxiety                                               |
| F01A11                | Vascular dementia, mild, with agitation                                                                                                                     |
| F01A18                | Vascular dementia, mild, with other behavioral disturbance                                                                                                  |
| F01A2                 | Vascular dementia, mild, with psychotic disturbance                                                                                                         |
| F01A3                 | Vascular dementia, mild, with mood disturbance                                                                                                              |
| F01A4                 | Vascular dementia, mild, with anxiety                                                                                                                       |
| F01B0                 | Vascular dementia, moderate, without behavioral disturbance, psychotic disturbance, mood disturbance, and anxiety                                           |
| F01B11                | Vascular dementia, moderate, with agitation                                                                                                                 |
| F01B18                | Vascular dementia, moderate, with other behavioral disturbance                                                                                              |
| F01B2                 | Vascular dementia, moderate, with psychotic disturbance                                                                                                     |
| F01B3                 | Vascular dementia, moderate, with mood disturbance                                                                                                          |
| F01B4                 | Vascular dementia, moderate, with anxiety                                                                                                                   |
| F01C0                 | Vascular dementia, severe, without behavioral disturbance, psychotic disturbance, mood disturbance, and anxiety                                             |
| F01C11                | Vascular dementia, severe, with agitation                                                                                                                   |
| F01C18                | Vascular dementia, severe, with other behavioral disturbance                                                                                                |
| F01C2                 | Vascular dementia, severe, with psychotic disturbance                                                                                                       |
| F01C3                 | Vascular dementia, severe, with mood disturbance                                                                                                            |
| F01C4                 | Vascular dementia, severe, with anxiety                                                                                                                     |
| F0280                 | Dementia in other diseases classified elsewhere, unspecified severity, without behavioral disturbance, psychotic disturbance, mood disturbance, and anxiety |
| F0281                 | Dementia in other diseases classified elsewhere with behavioral disturbance                                                                                 |
| F02811                | Dementia in other diseases classified elsewhere, unspecified severity, with agitation                                                                       |
| F02818                | Dementia in other diseases classified elsewhere, unspecified severity, with other behavioral disturbance                                                    |

|        |                                                                                                                                                 |
|--------|-------------------------------------------------------------------------------------------------------------------------------------------------|
| F0282  | Dementia in other diseases classified elsewhere, unspecified severity, with psychotic disturbance                                               |
| F0283  | Dementia in other diseases classified elsewhere, unspecified severity, with mood disturbance                                                    |
| F0284  | Dementia in other diseases classified elsewhere, unspecified severity, with anxiety                                                             |
| F02A0  | Dementia in other diseases classified elsewhere, mild, without behavioral disturbance, psychotic disturbance, mood disturbance, and anxiety     |
| F02A11 | Dementia in other diseases classified elsewhere, mild, with agitation                                                                           |
| F02A18 | Dementia in other diseases classified elsewhere, mild, with other behavioral disturbance                                                        |
| F02A2  | Dementia in other diseases classified elsewhere, mild, with psychotic disturbance                                                               |
| F02A3  | Dementia in other diseases classified elsewhere, mild, with mood disturbance                                                                    |
| F02A4  | Dementia in other diseases classified elsewhere, mild, with anxiety                                                                             |
| F02B0  | Dementia in other diseases classified elsewhere, moderate, without behavioral disturbance, psychotic disturbance, mood disturbance, and anxiety |
| F02B11 | Dementia in other diseases classified elsewhere, moderate, with agitation                                                                       |
| F02B18 | Dementia in other diseases classified elsewhere, moderate, with other behavioral disturbance                                                    |
| F02B2  | Dementia in other diseases classified elsewhere, moderate, with psychotic disturbance                                                           |
| F02B3  | Dementia in other diseases classified elsewhere, moderate, with mood disturbance                                                                |
| F02B4  | Dementia in other diseases classified elsewhere, moderate, with anxiety                                                                         |
| F02C0  | Dementia in other diseases classified elsewhere, severe, without behavioral disturbance, psychotic disturbance, mood disturbance, and anxiety   |
| F02C11 | Dementia in other diseases classified elsewhere, severe, with agitation                                                                         |
| F02C18 | Dementia in other diseases classified elsewhere, severe, with other behavioral disturbance                                                      |
| F02C2  | Dementia in other diseases classified elsewhere, severe, with psychotic disturbance                                                             |
| F02C3  | Dementia in other diseases classified elsewhere, severe, with mood disturbance                                                                  |
| F02C4  | Dementia in other diseases classified elsewhere, severe, with anxiety                                                                           |

Supplementary Table S2: List of unspecified dementia ICD-10 codes and corresponding descriptions

| <b>Unspecified ICD-10 Code</b> | <b>Description</b>                                                                                                               |
|--------------------------------|----------------------------------------------------------------------------------------------------------------------------------|
| F0390                          | Unspecified dementia, unspecified severity, without behavioral disturbance, psychotic disturbance, mood disturbance, and anxiety |
| F0391                          | Unspecified dementia with behavioral disturbance                                                                                 |
| F03911                         | Unspecified dementia, unspecified severity, with agitation                                                                       |
| F03918                         | Unspecified dementia, unspecified severity, with other behavioral disturbance                                                    |
| F0392                          | Unspecified dementia, unspecified severity, with psychotic disturbance                                                           |
| F0393                          | Unspecified dementia, unspecified severity, with mood disturbance                                                                |
| F0394                          | Unspecified dementia, unspecified severity, with anxiety                                                                         |
| F03A0                          | Unspecified dementia, mild, without behavioral disturbance, psychotic disturbance, mood disturbance, and anxiety                 |
| F03A11                         | Unspecified dementia, mild, with agitation                                                                                       |
| F03A18                         | Unspecified dementia, mild, with other behavioral disturbance                                                                    |
| F03A2                          | Unspecified dementia, mild, with psychotic disturbance                                                                           |
| F03A3                          | Unspecified dementia, mild, with mood disturbance                                                                                |
| F03A4                          | Unspecified dementia, mild, with anxiety                                                                                         |
| F03B0                          | Unspecified dementia, moderate, without behavioral disturbance, psychotic disturbance, mood disturbance, and anxiety             |
| F03B11                         | Unspecified dementia, moderate, with agitation                                                                                   |
| F03B18                         | Unspecified dementia, moderate, with other behavioral disturbance                                                                |
| F03B2                          | Unspecified dementia, moderate, with psychotic disturbance                                                                       |
| F03B3                          | Unspecified dementia, moderate, with mood disturbance                                                                            |
| F03B4                          | Unspecified dementia, moderate, with anxiety                                                                                     |
| F03C0                          | Unspecified dementia, severe, without behavioral disturbance, psychotic disturbance, mood disturbance, and anxiety               |
| F03C11                         | Unspecified dementia, severe, with agitation                                                                                     |
| F03C18                         | Unspecified dementia, severe, with other behavioral disturbance                                                                  |
| F03C2                          | Unspecified dementia, severe, with psychotic disturbance                                                                         |
| F03C3                          | Unspecified dementia, severe, with mood disturbance                                                                              |
| F03C4                          | Unspecified dementia, severe, with anxiety                                                                                       |
